# Supplementary material
Source: PubMed Central journal article supplement (PMC8591019)
Supplement: 10434_2021_10187_MOESM2_ESM.pdf [file 10434_2021_10187_MOESM2_ESM.pdf]

**Suppl. Tab. 1: Extended patient follow-up data.**

Patient follow-up was performed after trial termination. Due to this fact, respective data and all resultant analyses should be regarded as exploratory and with respective caution. Overall survival is annotated as the time span between the date of surgery and death or last recorded patient contact. Known time of death is annotated with Y (yes), otherwise N (no) is indicated. Progression-free survival (PFS) is recorded as the time to first documented cancer recurrence with respective site of recurrence if available or by last time of contact and n.a. in case the patients remained without recurrence.

OS: Overall survival; PFS: Progression-free survival; R0: microscopically complete resection; R1: residual disease in microscopy; Y - yes; N – no.; n.a. - not applicable; n.d. - no data available.

| <b>Pat. No.</b> | <b>OS (months)</b> | <b>Death Y/N</b> | <b>PFS (months)</b> | <b>Site of recurrence</b> | <b>Resection status</b> |
|-----------------|--------------------|------------------|---------------------|---------------------------|-------------------------|
| 1               | 4.4                | Y                | n.d.                | n.d.                      | R1                      |
| 2               | 6.6                | Y                | n.d.                | n.d.                      | R1                      |
| 3               | 6.8                | Y                | n.d.                | n.d.                      | R1                      |
| 4               | 9.0                | Y                | n.d.                | n.d.                      | R0                      |
| 5               | 9.1                | Y                | 6.0                 | Liver, Lung               | R0                      |
| 6               | 9.5                | Y                | 1.3                 | Peritoneum                | R1                      |
| 7               | 14.1               | Y                | 6.5                 | Peritoneum                | R1                      |
| 8               | 16.1               | Y                | 3.0                 | Liver, Peritoneum         | R0                      |
| 9               | 17.1               | Y                | 3.2                 | Liver                     | R1                      |
| 10              | 21.2               | Y                | 2.0                 | Local, Lymph node         | R1                      |
| 11              | 23.1               | N                | 1.7                 | Local                     | R1                      |
| 12              | 23.8               | Y                | 6.1                 | Local, Liver, Peritoneum  | R0                      |
| 13              | 24.2               | N                | 2.7                 | Local                     | R1                      |
| 14              | 25.6               | N                | n.d.                | n.a.                      | R0                      |
| 15              | 27.5               | N                | 27.5                | n.a.                      | R0                      |
| 16              | 27.9               | N                | 7.4                 | Liver                     | R1                      |
